# Supplementary material for: Network-based repurposing identifies anti-alarmins as drug candidates to control severe lung inflammation in COVID-19
Source: PubMed Central journal article supplement (PMC8297899; doi:10.1371/journal.pone.0254374), 2021-07-22
Supplement: pone.0254374.s001.pdf [file pone.0254374.s001.pdf]

**Supplementary Table 1: Candidate COVID-19 related disease genes**

| Gene Symbol                            | Gene ID | Gene expression on NHBE cells after SARS-CoV-2 infection (GSE147507) |            | Gene expression on Calu-3 cell line after SARS-CoV-2 infection (GSE147507) |            | Relevance of COVID-19 related proteins based on additional data sources: molecular profiling data of human lung tissues infected by SARS-CoV-2 or other respiratory viruses, deep-immunophenotyping/ cytokine profiling data in the blood or lungs of patients with severe COVID-19                                                                                                                                                                                                                                                |
|----------------------------------------|---------|----------------------------------------------------------------------|------------|----------------------------------------------------------------------------|------------|------------------------------------------------------------------------------------------------------------------------------------------------------------------------------------------------------------------------------------------------------------------------------------------------------------------------------------------------------------------------------------------------------------------------------------------------------------------------------------------------------------------------------------|
|                                        |         | Log Fc                                                               | pValue     | Log Fc                                                                     | pValue     |                                                                                                                                                                                                                                                                                                                                                                                                                                                                                                                                    |
| <b>Cytokine Release Syndrome (CRS)</b> |         |                                                                      |            |                                                                            |            |                                                                                                                                                                                                                                                                                                                                                                                                                                                                                                                                    |
| <b>C5</b>                              | 727     | NS                                                                   | NS         | NS                                                                         | NS         | <ul style="list-style-type: none"> <li>- Elevated levels of C5a in bronchoalveolar liquid fluid (BALF) of COVID-19 patients with acute respiratory distress syndrome (ARDS) (Carvelli et al.)<sup>1</sup></li> <li>- High plasma levels of soluble C5b9 in COVID-19 patients (Peffault de Latour et al.)<sup>2</sup></li> <li>- Interest of targeting proinflammatory C5a in COVID-19 (Merad et al.)<sup>3</sup></li> </ul>                                                                                                        |
| <b>C5aR1</b>                           | 728     | NS                                                                   | NS         | NS                                                                         | NS         | C5aR1+ cells detected in neutrophils and monocytes from lung samples of COVID-19 patients with ARDS (Carvelli et al.) <sup>1</sup>                                                                                                                                                                                                                                                                                                                                                                                                 |
| <b>CCL2 (MCP-1)</b>                    | 6347    | NA                                                                   | NA         | 2,27199792                                                                 | 0,00033869 | <ul style="list-style-type: none"> <li>- CCL2 gene expression detected in BALF of COVID-19 patients with ARDS (Carvelli et al.)<sup>1</sup></li> <li>- High expression of CCL2 in single-cell RNA sequenced BALF macrophages from COVID-19 patients (Liao et al.)<sup>4</sup></li> <li>- Elevated levels of circulating CCL2 associated with COVID-19 severity (Hadjadj et al.)<sup>5</sup></li> </ul>                                                                                                                             |
| <b>CCL20</b>                           | 6364    | 2,80512267                                                           | 0,00644687 | 3,72792364                                                                 | 0,0014312  | Upregulated gene expression in SARS-CoV infected in human peripheral blood mononuclear cells (PBMCs) (Ng et al.) <sup>6</sup>                                                                                                                                                                                                                                                                                                                                                                                                      |
| <b>CCL5</b>                            | 6352    | NS                                                                   | NS         | 4,0079621                                                                  | 0,00071506 |                                                                                                                                                                                                                                                                                                                                                                                                                                                                                                                                    |
| <b>CCL7 (MCP-3)</b>                    | 6354    | NS                                                                   | NS         | NS                                                                         | NS         | <ul style="list-style-type: none"> <li>- Increased plasma levels of CCL7 in COVID-19 patients associated with disease severity (Vabret et al.)<sup>7</sup></li> <li>- High expression of CCL7 in single-cell RNA sequenced BALF macrophages from COVID-19 patients (Liao et al.)<sup>4</sup></li> </ul>                                                                                                                                                                                                                            |
| <b>CSF2 (GM-CSF)</b>                   | 1437    | 1,12015328                                                           | 0,00070066 | 4,43508382                                                                 | 7,3065E-17 | Increased frequency of GM-CSF+IFN- $\gamma$ + T cells and CD14+CD16+GM-CSF+ monocytes in blood from COVID-19 patients (Vabret et al.) <sup>7</sup>                                                                                                                                                                                                                                                                                                                                                                                 |
| <b>CXCL10 (IP10)</b>                   | 3627    | NS                                                                   | NS         | 4,6211212                                                                  | 0,00072944 | <ul style="list-style-type: none"> <li>- Increased plasma levels of CXCL10 in COVID-19 patients associated with disease severity (Vabret et al., Laing et al.)<sup>7,8</sup></li> <li>- High expression of CXCL10 in single-cell RNA sequenced BALF macrophages from COVID-19 patients (Liao et al.)<sup>4</sup></li> <li>- Increased CXCL10 gene expression in lung biopsies from COVID-19 patients (Ackermann et al.)<sup>9</sup></li> </ul>                                                                                     |
| <b>CXCL11</b>                          | 6373    | NS                                                                   | NS         | 4,53540857                                                                 | 0,0007608  | High expression of CXCL11 on single-cell RNA sequenced BALF macrophages from COVID-19 patients (Liao et al.) <sup>4</sup>                                                                                                                                                                                                                                                                                                                                                                                                          |
| <b>CXCL5</b>                           | 6374    | 1,79511867                                                           | 3,0178E-6  | 1,03717803                                                                 | 0,00855694 | <ul style="list-style-type: none"> <li>- CXCL5 contributes to SARS-CoV-2 induced lung inflammation in a hACE2 transgenic mouse model (Laing et al.)<sup>8</sup></li> <li>- Implication of CXCL5-mediated neutrophil recruitment in viral-induced asthma exacerbation (Sokulsky et al.)<sup>10</sup></li> <li>- Top hub gene from transcriptome network analysis of SARS-CoV-2 infected human cell (Fagone et al.)<sup>11</sup></li> </ul>                                                                                          |
| <b>CXCL8 (IL8)</b>                     | 3576    | NA                                                                   | NA         | NA                                                                         | NA         | <ul style="list-style-type: none"> <li>- Increased plasma levels of CXCL8 in COVID-19 patients associated with disease severity (Vabret et al., Laing et al.)<sup>7,8</sup></li> <li>- CXCL8 detected in BALF of COVID-19 patients with ARDS (Carvelli et al.)<sup>1</sup></li> <li>- Increased CXCL8 gene expression in lung biopsies from COVID-19 patients (Ackermann et al.)<sup>9</sup></li> <li>- Top hub gene from transcriptome network analysis of SARS-CoV-2 infected human cell (Fagone et al.)<sup>11</sup></li> </ul> |
| <b>IFN<math>\gamma</math></b>          | 3458    | NA                                                                   | NA         | NA                                                                         | NA         | <ul style="list-style-type: none"> <li>- Increased plasma levels of IFN<math>\gamma</math> in COVID-19 patients (Vabret et al.)<sup>7</sup></li> <li>- Interest of targeting IFN<math>\gamma</math> in COVID-19 (Merad et al., Ye et al.)<sup>3,12</sup></li> <li>- IFN<math>\gamma</math> implication in coronavirus recognition and immune response, in relationship with obesity, age, and risk of severe COVID-19 (Brodin)<sup>13</sup></li> </ul>                                                                             |
| <b>IL12A</b>                           | 3592    | NS                                                                   | NS         | 2,06155735                                                                 | 7,6616E-06 | IL12A implication in coronavirus recognition and immune response, in relationship with obesity, age, and risk of severe COVID-19 (Brodin) <sup>13</sup>                                                                                                                                                                                                                                                                                                                                                                            |
| <b>IL15</b>                            | 3600    | NS                                                                   | NS         | 1,37007695                                                                 | 0,00492881 |                                                                                                                                                                                                                                                                                                                                                                                                                                                                                                                                    |

| Gene Symbol        | Gene ID      | Gene expression on NHBE cells after SARS-CoV-2 infection (GSE147507) |            | Gene expression on Calu-3 cell line after SARS-CoV-2 infection (GSE147507) |            | Relevance of COVID-19 related proteins based on additional data sources: molecular profiling data of human lung tissues infected by SARS-CoV-2 or other respiratory viruses, deep-immunophenotyping/ cytokine profiling data in the blood or lungs of patients with severe COVID-19                                                                                                                                                                                                                                                                                                                                                                                                                                                                                                                        |
|--------------------|--------------|----------------------------------------------------------------------|------------|----------------------------------------------------------------------------|------------|------------------------------------------------------------------------------------------------------------------------------------------------------------------------------------------------------------------------------------------------------------------------------------------------------------------------------------------------------------------------------------------------------------------------------------------------------------------------------------------------------------------------------------------------------------------------------------------------------------------------------------------------------------------------------------------------------------------------------------------------------------------------------------------------------------|
|                    |              | Log Fc                                                               | pValue     | Log Fc                                                                     | pValue     |                                                                                                                                                                                                                                                                                                                                                                                                                                                                                                                                                                                                                                                                                                                                                                                                            |
| <b>IL15RA</b>      | 3601         | NS                                                                   | NS         | 1,9033827                                                                  | 0,00013765 |                                                                                                                                                                                                                                                                                                                                                                                                                                                                                                                                                                                                                                                                                                                                                                                                            |
| <b>IL1β</b>        | 3553         | 1,03550935                                                           | 0,00911132 | 3,91985098                                                                 | 4,991E-12  | <ul style="list-style-type: none"> <li>- IL1β detected in BALF of COVID-19 patients with ARDS (Carvelli et al.)<sup>1</sup></li> <li>- High expression of IL1β in single-cell RNA sequenced BALF macrophages from COVID-19 patients (Liao et al.)<sup>4</sup></li> <li>- Increased blood levels of CD14+ IL1β+ monocytes in COVID-19 patients (Wen et al.)<sup>14</sup></li> <li>- Top hub gene from transcriptome network analysis of SARS-CoV-2 infected human cell (Fagone et al.)<sup>11</sup></li> <li>- IL1β implication in coronavirus recognition and immune response, in relationship with obesity, age, and risk of severe COVID-19 (Brodin)<sup>13</sup></li> </ul>                                                                                                                             |
| <b>IL2</b>         | 3558         | NA                                                                   | NA         | NA                                                                         | NA         | Increased plasma levels of IL2 in COVID-19 patients (Vabret et al.) <sup>7</sup>                                                                                                                                                                                                                                                                                                                                                                                                                                                                                                                                                                                                                                                                                                                           |
| <b>IL23A</b>       | 51561        | NS                                                                   | NS         | 1,21854059                                                                 | 0,00120562 |                                                                                                                                                                                                                                                                                                                                                                                                                                                                                                                                                                                                                                                                                                                                                                                                            |
| <b>IL32</b>        | 9235         | 1,73869606                                                           | 0,00014965 | 1,20922853                                                                 | 0,0134375  |                                                                                                                                                                                                                                                                                                                                                                                                                                                                                                                                                                                                                                                                                                                                                                                                            |
| <b>IL36G</b>       | 56300        | 2,16695495                                                           | 5,883E-05  | NS                                                                         | NS         |                                                                                                                                                                                                                                                                                                                                                                                                                                                                                                                                                                                                                                                                                                                                                                                                            |
| <b>IL6</b>         | 3569         | 2,00320976                                                           | 0,00194694 | 5,11939899                                                                 | 1,5515E-09 | <ul style="list-style-type: none"> <li>- Increased plasma levels of IL6 in COVID-19 patients associated with disease severity (Vabret et al., Laing et al., Hadjadj et al.)<sup>5,7,8</sup></li> <li>- IL6 detected in BALF of COVID-19 patients with ARDS (Carvelli et al.)<sup>1</sup></li> <li>- High expression of IL6 in single-cell RNA sequenced BALF macrophages from COVID-19 patients (Liao et al.)<sup>4</sup></li> <li>- Increased IL6 gene expression in lung biopsies from COVID-19 patients (Ackermann et al.)<sup>9</sup></li> <li>- Top hub gene from transcriptome network analysis of SARS-CoV-2 infected human cell (Fagone et al.)<sup>11</sup></li> <li>- Interest of targeting IL6 in COVID-19 (Merad et al., Ye et al., Moore et al., Rica et al.)<sup>3,12,15,16</sup></li> </ul> |
| <b>JAK1</b>        |              | 0,56164939                                                           | 0,00984357 | NS                                                                         | NS         | Interest of targeting JAK-STAT pathway in COVID-19 (Luo et al.) <sup>17</sup>                                                                                                                                                                                                                                                                                                                                                                                                                                                                                                                                                                                                                                                                                                                              |
| <b>JAK2</b>        |              | NS                                                                   | NS         | 1,45997096                                                                 | 0,00011929 | Interest of targeting JAK-STAT pathway in COVID-19 (Luo et al.) <sup>17</sup>                                                                                                                                                                                                                                                                                                                                                                                                                                                                                                                                                                                                                                                                                                                              |
| <b>TNFα</b>        | 7124         | NS                                                                   | NS         | 4,77158416                                                                 | 1,827E-07  | <ul style="list-style-type: none"> <li>- TNFα detected in BALF of COVID-19 patients with ARDS (Carvelli et al.)<sup>1</sup></li> <li>- High expression of TNFα in single-cell RNA sequenced BALF macrophages from COVID-19 patients (Liao et al.)<sup>4</sup></li> <li>- Elevated TNFα serum concentration associated with critical COVID-19 (Leisman et al., Hadjadj et al.)<sup>5,18</sup></li> <li>- TNFα implication in coronavirus recognition and immune response, in relationship with obesity, age, and risk of severe COVID-19 (Brodin)<sup>13</sup></li> <li>- Interest of targeting TNFα in COVID-19 (Ye et al.)<sup>12</sup></li> </ul>                                                                                                                                                        |
| <b>IL17RA</b>      | 23765        | NS                                                                   | NS         | NS                                                                         | NS         | Increased blood levels of IL17 in COVID-19 patients associated with lung injury (Pacha et al.) <sup>19</sup>                                                                                                                                                                                                                                                                                                                                                                                                                                                                                                                                                                                                                                                                                               |
| <b>Alarmins</b>    |              |                                                                      |            |                                                                            |            |                                                                                                                                                                                                                                                                                                                                                                                                                                                                                                                                                                                                                                                                                                                                                                                                            |
| <b>AGER (RAGE)</b> | 177          | NS                                                                   | NS         | NS                                                                         | NS         | Low sRAGE levels in elderly patients with lung involvement (Yalcine Kehribar et al.) <sup>20</sup>                                                                                                                                                                                                                                                                                                                                                                                                                                                                                                                                                                                                                                                                                                         |
| <b>CAMP</b>        | 820          | NS                                                                   | NS         | NS                                                                         | NS         | Role of Vitamin D in the regulation of CAMP gene expression in the course of COVID-19 disease (Roth et al.) <sup>21</sup>                                                                                                                                                                                                                                                                                                                                                                                                                                                                                                                                                                                                                                                                                  |
| <b>Defensin α</b>  | Group ID 502 | NA                                                                   | NA         | NA                                                                         | NA         | Downregulation of α-Defensin gene expression following SARS-CoV-2 infection (Idris et al.) <sup>22</sup>                                                                                                                                                                                                                                                                                                                                                                                                                                                                                                                                                                                                                                                                                                   |
| <b>Defensin β</b>  | Group ID 503 | NA                                                                   | NA         | NA                                                                         | NA         | Downregulation of β-Defensin gene expression following SARS-CoV-2 infection (Idris et al.) <sup>22</sup>                                                                                                                                                                                                                                                                                                                                                                                                                                                                                                                                                                                                                                                                                                   |
| <b>EDN1</b>        | 1906         | NS                                                                   | NS         | 1,86633662                                                                 | 0,00981865 |                                                                                                                                                                                                                                                                                                                                                                                                                                                                                                                                                                                                                                                                                                                                                                                                            |
| <b>EDN2</b>        | 1907         | NS                                                                   | NS         | 2,01436393                                                                 | 1,389E-05  |                                                                                                                                                                                                                                                                                                                                                                                                                                                                                                                                                                                                                                                                                                                                                                                                            |
| <b>FN1</b>         |              | 1,25633714                                                           | 0,00806437 | NS                                                                         | NS         | Increased FN1 gene expression in lung biopsies from COVID-19 patients (Ackermann et al.) <sup>9</sup>                                                                                                                                                                                                                                                                                                                                                                                                                                                                                                                                                                                                                                                                                                      |
| <b>GPLY</b>        | 10578        | NS                                                                   | NS         | NS                                                                         | NS         | Elevated CD4+ and CD8+ effector T cells expressing GPLY are associated with convalescence in moderate COVID-19 patients (Zhang et al.) <sup>23</sup>                                                                                                                                                                                                                                                                                                                                                                                                                                                                                                                                                                                                                                                       |
| <b>HMGB1</b>       | 3146         | NS                                                                   | NS         | -0,7123577                                                                 | 0,00335352 | Elevated serum levels of HMGB1 correlates with inferior clinical outcomes in COVID-19 patients (Chen et al.) <sup>24</sup>                                                                                                                                                                                                                                                                                                                                                                                                                                                                                                                                                                                                                                                                                 |
| <b>IL1A</b>        | 3552         | NS                                                                   | NS         | 4,95457015                                                                 | 2,0084E-12 | Top hub gene from transcriptome network analysis of SARS-CoV-2 infected human cell (Fagone et al.) <sup>11</sup>                                                                                                                                                                                                                                                                                                                                                                                                                                                                                                                                                                                                                                                                                           |
| <b>IL1R1</b>       | 3554         | 0,50439323                                                           | 0,05023721 | NS                                                                         | NS         | Elevated serum levels of IL1R1 in COVID-19 patients (Choreño-Parra et al.) <sup>25</sup>                                                                                                                                                                                                                                                                                                                                                                                                                                                                                                                                                                                                                                                                                                                   |

| Gene Symbol          | Gene ID | Gene expression on NHBE cells after SARS-CoV-2 infection (GSE147507) |            | Gene expression on Calu-3 cell line after SARS-CoV-2 infection (GSE147507) |            | Relevance of COVID-19 related proteins based on additional data sources: molecular profiling data of human lung tissues infected by SARS-CoV-2 or other respiratory viruses, deep-immunophenotyping/ cytokine profiling data in the blood or lungs of patients with severe COVID-19                                                                                                                                                                                                                                                                                              |
|----------------------|---------|----------------------------------------------------------------------|------------|----------------------------------------------------------------------------|------------|----------------------------------------------------------------------------------------------------------------------------------------------------------------------------------------------------------------------------------------------------------------------------------------------------------------------------------------------------------------------------------------------------------------------------------------------------------------------------------------------------------------------------------------------------------------------------------|
|                      |         | Log Fc                                                               | pValue     | Log Fc                                                                     | pValue     |                                                                                                                                                                                                                                                                                                                                                                                                                                                                                                                                                                                  |
| <b>IL25</b>          | 64806   | NA                                                                   | NA         | NA                                                                         | NA         | - Increased production of IL25 during lung inflammation associated with allergic asthma (Atamas et al.) <sup>26</sup><br>- Interest of targeting IL25 in COVID-19 (Rica et al.) <sup>16</sup>                                                                                                                                                                                                                                                                                                                                                                                    |
| <b>IL33</b>          | 90865   | NS                                                                   | NS         | NS                                                                         | NS         | - High serum IL33 levels correlates with adverse COVID-19 outcome (Burke et al., Ye et al., Zizzo et al.) <sup>12,27,28</sup><br>- Increased production of IL33 during lung inflammation associated with allergic asthma (Atamas et al.) <sup>26</sup><br>- Interest of targeting IL33 in COVID-19 (Rica et al.) <sup>16</sup>                                                                                                                                                                                                                                                   |
| <b>S100A4</b>        | 6275    | NS                                                                   | NS         | NS                                                                         | NS         | S100A4+ T cells detected in the blood of COVID-19 patients (Zhang et al.) <sup>23</sup>                                                                                                                                                                                                                                                                                                                                                                                                                                                                                          |
| <b>S100A7</b>        | 6278    | NS                                                                   | NS         | NS                                                                         | NS         | Top hub gene from transcriptome network analysis of SARS-CoV-2 infected human cell (Fagone et al.) <sup>11</sup>                                                                                                                                                                                                                                                                                                                                                                                                                                                                 |
| <b>S100A7A</b>       | 338324  | 0,62524042                                                           | 2,019E-07  | NS                                                                         | NS         |                                                                                                                                                                                                                                                                                                                                                                                                                                                                                                                                                                                  |
| <b>S100A8</b>        | 6279    | NS                                                                   | NS         | NS                                                                         | NS         | - Elevated gene expression levels of S100A8 mRNA and protein level in lung samples from fatal COVID-19 cases (Wu et al.) <sup>29</sup><br>- Elevated serum levels of S100A8/A9 are correlated with inferior clinical outcomes in COVID-19 patients (Chen et al.) <sup>24</sup><br>- Single-cell landscape of bronchoalveolar immune cells (Liao et al.) <sup>4</sup><br>- Elevated plasma levels in severe COVID-19 patients (Silvin et al.) <sup>30</sup><br>- Top hub gene from transcriptome network analysis of SARS-CoV-2 infected human cell (Fagone et al.) <sup>11</sup> |
| <b>S100A9</b>        | 6280    | NS                                                                   | NS         | NS                                                                         | NS         | - Elevated gene expression levels of S100A9 mRNA and protein level in lung samples from fatal cases of COVID-19 (Wu et al.) <sup>29</sup><br>- Elevated serum levels of S100A8/A9 are correlated with inferior clinical outcomes in COVID-19 patients (Chen et al.) <sup>24</sup><br>- Elevated plasma levels in severe COVID-19 patients (Silvin et al.) <sup>30</sup><br>- Top hub gene from transcriptome network analysis of SARS-CoV-2 infected human cell (Fagone et al.) <sup>11</sup>                                                                                    |
| <b>S100A10</b>       | 6281    | NS                                                                   | NS         | -0,4801333                                                                 | 0,08343353 | Elevated anti- Annexin A2 antibodies associated with high mortality in COVID-19 patients (Zuniga et al.) <sup>31</sup>                                                                                                                                                                                                                                                                                                                                                                                                                                                           |
| <b>S100A11</b>       | 6282    | 0,4543227                                                            | 0,0858988  | NS                                                                         | NS         | Elevated gene expression levels of S100A11 mRNA and protein level in lung samples in fatal COVID-19 cases (Wu et al.) <sup>29</sup>                                                                                                                                                                                                                                                                                                                                                                                                                                              |
| <b>S100A12</b>       | 6283    | 0,43317817                                                           | 0,06620747 | NS                                                                         | NS         | - Increased gene expression levels of S100A12 mRNA and protein level in lung samples in fatal COVID-19 cases (Wu et al.) <sup>29</sup><br>- Single-cell RNASeq detects S100A12+ neutrophils in the blood of patients with severe COVID-19 (Combes et al.) <sup>32</sup><br>- Plasma levels of S100A12 elevated in severe COVID-19 patients (Arunachalam et al.) <sup>33</sup><br>- Top hub gene from transcriptome network analysis of SARS-CoV-2 infected human cell (Fagone et al.) <sup>11</sup>                                                                              |
| <b>S100B</b>         | 6285    | NA                                                                   | NA         | NA                                                                         | NA         | Detection of serum S100B associated with disease severity (Aceti et al.) <sup>34</sup>                                                                                                                                                                                                                                                                                                                                                                                                                                                                                           |
| <b>S100P</b>         | 6286    | NS                                                                   | NS         | 1,47488119                                                                 | 0,02103115 | Elevated gene expression of S100P mRNA and protein in lung samples in fatal cases (Wu et al.) <sup>29</sup>                                                                                                                                                                                                                                                                                                                                                                                                                                                                      |
| <b>ST2</b>           | 9173    | NA                                                                   | NA         | NA                                                                         | NA         | - Elevated serum levels of ST2 in patients with COVID-19 (Zeng et al.) <sup>35</sup><br>- Interest of targeting ST2 based on increased expression in COVID-19 (Zizzo et al.) <sup>28</sup>                                                                                                                                                                                                                                                                                                                                                                                       |
| <b>TSLP</b>          | 85480   | NS                                                                   | NS         | NS                                                                         | NS         | - Elevated serum levels of TSLP in COVID-19 patients (Choreño-Parra et al.) <sup>25</sup><br>- Increased production of TSLP during lung inflammation associated with allergic asthma (Atamas et al.) <sup>26</sup>                                                                                                                                                                                                                                                                                                                                                               |
| <b>CRLF2 (TSLPR)</b> | 14281   | NA                                                                   | NA         | NA                                                                         | NA         | Elevated serum levels in COVID-19 patients (Choreño-Parra et al.) <sup>25</sup>                                                                                                                                                                                                                                                                                                                                                                                                                                                                                                  |

NA: Not available; NS: Not significant

## References:

- 1 Carvelli J, Demaria O, Vély F, *et al.* Association of COVID-19 inflammation with activation of the C5a–C5aR1 axis. *Nature* 2020; **588**: 146–50.
- 2 Peffault de Latour R, Bergeron A, Lengline E, *et al.* Complement C5 inhibition in patients with COVID-19 - a promising target? *Haematologica* 2020; **105**: 2847–50.
- 3 Merad M, Martin JC. Pathological inflammation in patients with COVID-19: a key role for monocytes and macrophages. *Nature Reviews Immunology* 2020; **20**: 355–62.
- 4 Liao M, Liu Y, Yuan J, *et al.* Single-cell landscape of bronchoalveolar immune cells in patients with COVID-19. *Nature Medicine* 2020; **26**: 842–4.
- 5 Hadjadj J, Yatim N, Barnabei L, *et al.* Impaired type I interferon activity and exacerbated inflammatory responses in severe Covid-19 patients. *medRxiv* 2020; : 2020.04.19.20068015.
- 6 Ng LFP, Hibberd ML, Ooi E-E, *et al.* A human in vitro model system for investigating genome-wide host responses to SARS coronavirus infection. *BMC Infect Dis* 2004; **4**: 34.
- 7 Vabret N, Britton GJ, Gruber C, *et al.* Immunology of COVID-19: Current State of the Science. *Immunity* 2020; **52**: 910–41.
- 8 Laing AG, Lorenc A, del Molino del Barrio I, *et al.* A dynamic COVID-19 immune signature includes associations with poor prognosis. *Nature Medicine* 2020; **26**: 1623–35.
- 9 Ackermann M, Verleden SE, Kuehnel M, *et al.* Pulmonary Vascular Endothelialitis, Thrombosis, and Angiogenesis in Covid-19. *New England Journal of Medicine* 2020; **383**: 120–8.
- 10 Sokulsky LA, Garcia-Netto K, Nguyen TH, *et al.* A Critical Role for the CXCL3/CXCL5/CXCR2 Neutrophilic Chemotactic Axis in the Regulation of Type 2 Responses in a Model of Rhinoviral-Induced Asthma Exacerbation. *The Journal of Immunology* 2020; **205**: 2468–78.
- 11 Fagone P, Ciurleo R, Lombardo SD, *et al.* Transcriptional landscape of SARS-CoV-2 infection dismantles pathogenic pathways activated by the virus, proposes unique sex-specific differences and predicts tailored therapeutic strategies. *Autoimmunity Reviews* 2020; **19**: 102571.
- 12 Ye Q, Wang B, Mao J. The pathogenesis and treatment of the 'Cytokine Storm' in COVID-19. *J Infect* 2020; **80**: 607–13.
- 13 Brodin P. Immune determinants of COVID-19 disease presentation and severity. *Nature Medicine* 2021; **27**: 28–33.
- 14 Wen W, Su W, Tang H, *et al.* Immune cell profiling of COVID-19 patients in the recovery stage by single-cell sequencing. *Cell Discovery* 2020; **6**: 1–18.
- 15 Moore JB, June CH. Cytokine release syndrome in severe COVID-19. *Science* 2020; **368**: 473–4.
- 16 de la Rica R, Borges M, Gonzalez-Freire M. COVID-19: In the Eye of the Cytokine Storm. *Front Immunol* 2020; **11**. DOI:10.3389/fimmu.2020.558898.
- 17 Luo W, Li Y-X, Jiang L-J, Chen Q, Wang T, Ye D-W. Targeting JAK-STAT Signaling to Control Cytokine Release Syndrome in COVID-19. *Trends in Pharmacological Sciences* 2020; **41**: 531–43.
- 18 Leisman DE, Ronner L, Pinotti R, *et al.* Cytokine elevation in severe and critical COVID-19: a rapid systematic review, meta-analysis, and comparison with other inflammatory syndromes. *The Lancet Respiratory Medicine* 2020; **8**: 1233–44.
- 19 Pacha O, Sallman MA, Evans SE. COVID-19: a case for inhibiting IL-17? *Nature reviews Immunology* 2020; **20**: 345–6.

- 20 Yalcin Kehribar D, Cihangiroglu M, Sehmen E, *et al.* The receptor for advanced glycation end product (RAGE) pathway in COVID-19. *Biomarkers* 2021; : 1–5.
- 21 Roth A, Lütke S, Meinberger D, *et al.* LL-37 fights SARS-CoV-2: The Vitamin D-Inducible Peptide LL-37 Inhibits Binding of SARS-CoV-2 Spike Protein to its Cellular Receptor Angiotensin Converting Enzyme 2 In Vitro. *bioRxiv* 2020; : 2020.12.02.408153.
- 22 Idris MM, Banu S, Siva AB, Nagaraj R. Downregulation of Defensin genes in SARS-CoV-2 infection. *medRxiv* 2020; : 2020.09.21.20195537.
- 23 Zhang J-Y, Wang X-M, Xing X, *et al.* Single-cell landscape of immunological responses in patients with COVID-19. *Nature Immunology* 2020; **21**: 1107–18.
- 24 Chen L, Long X, Xu Q, *et al.* Elevated serum levels of S100A8/A9 and HMGB1 at hospital admission are correlated with inferior clinical outcomes in COVID-19 patients. *Cellular & Molecular Immunology* 2020; **17**: 992–4.
- 25 Choreño-Parra JA, Jiménez-Álvarez LA, Cruz-Lagunas A, *et al.* Clinical and immunological factors that distinguish COVID-19 from pandemic influenza A(H1N1). *medRxiv* 2020; : 2020.08.10.20170761.
- 26 Atamas SP, Chapoval SP, Keegan AD. Cytokines in chronic respiratory diseases. *F1000 Biol Rep* 2013; **5**. DOI:10.3410/B5-3.
- 27 Burke H, Freeman A, Cellura DC, *et al.* Inflammatory phenotyping predicts clinical outcome in COVID-19. *Respiratory Research* 2020; **21**: 245.
- 28 Zizzo G, Cohen PL. Imperfect storm: is interleukin-33 the Achilles heel of COVID-19? *The Lancet Rheumatology* 2020; **2**: e779–90.
- 29 Wu M, Chen Y, Xia H, *et al.* Transcriptional and proteomic insights into the host response in fatal COVID-19 cases. *PNAS* 2020; **117**: 28336–43.
- 30 Silvin A, Chapuis N, Dunsmore G, *et al.* Elevated Calprotectin and Abnormal Myeloid Cell Subsets Discriminate Severe from Mild COVID-19. *Cell* 2020; **182**: 1401-1418.e18.
- 31 Zuniga M, Gomes C, Carsons SE, *et al.* Autoimmunity to the Lung Protective Phospholipid-Binding Protein Annexin A2 Predicts Mortality Among Hospitalized COVID-19 Patients. *medRxiv* 2021; : 2020.12.28.20248807.
- 32 Combes AJ, Courau T, Kuhn NF, *et al.* Global absence and targeting of protective immune states in severe COVID-19. *Nature* 2021; : 1–10.
- 33 Arunachalam PS, Wimmers F, Mok CKP, *et al.* Systems biological assessment of immunity to mild versus severe COVID-19 infection in humans. *Science* 2020; **369**: 1210–20.
- 34 A A, Lm M, E S, *et al.* Serum S100B protein as a marker of severity in Covid-19 patients. *Sci Rep* 2020; **10**: 18665–18665.
- 35 Zeng Z, Hong X-Y, Li Y, *et al.* Serum-soluble ST2 as a novel biomarker reflecting inflammatory status and illness severity in patients with COVID-19. *Biomarkers in Medicine* 2020; **14**: 1619–29.
