# Supplementary material for: Network-based repurposing identifies anti-alarmins as drug candidates to control severe lung inflammation in COVID-19
Source: PubMed Central journal article supplement (PMC8297899; doi:10.1371/journal.pone.0254374), 2021-07-22
Supplement: pone.0254374.s002.pdf [file pone.0254374.s002.pdf]

**Supplementary table 2: Pathways enrichment analysis**

| Pathways                                                                      | Covid vs Mock ( <i>Calu-3</i> ) |         | Covid vs Mock ( <i>NHBE</i> ) |         |
|-------------------------------------------------------------------------------|---------------------------------|---------|-------------------------------|---------|
|                                                                               | -log(p-value)                   | z-score | -log(p-value)                 | z-score |
| Interferon Signaling                                                          | 14,9357719                      | 4,123   | 0,683442248                   | 0       |
| PRR in Reco of Bacteria and Viruses                                           | 14,50864765                     | 4,472   | 2,24189323                    | 3       |
| Activation of IRF by Cytosolic PRR                                            | 12,99480525                     | 1,528   | 3,157269106                   | 1,732   |
| PKR in IFN Induction and Antiviral Response                                   | 11,31942565                     | 3,8     | 2,027834347                   | 2,84    |
| HMGB1 Signaling                                                               | 9,892816978                     | 4,69    | 4,136325824                   | 3,411   |
| TREM1 Signaling                                                               | 9,487339799                     | 4,243   | 2,480392326                   | 2,714   |
| Glucocorticoid Receptor Signaling                                             | 9,076600929                     | 0       | 3,141536633                   | 0       |
| Dendritic Cell Maturation                                                     | 8,795978612                     | 5,292   | 1,772605702                   | 2,982   |
| Toll-like Receptor Signaling                                                  | 7,673581383                     | 2,53    | 3,432181182                   | 1,265   |
| TNFR2 Signaling                                                               | 7,593047721                     | 1,667   | 2,565941826                   | 1,633   |
| Death Receptor Signaling                                                      | 7,20278698                      | 2,183   | 2,208166042                   | 1,387   |
| NF-κB Signaling                                                               | 7,160638145                     | 3       | 1,868981762                   | 1,789   |
| Granulocyte Adhesion and Diapedesis                                           | 6,529496585                     | 0       | 2,79474373                    | 0       |
| PPAR Signaling                                                                | 6,286538017                     | -2,828  | 3,879057447                   | -3,3    |
| Inflammasome pathway                                                          | 6,006448638                     | 2,828   | 2,867468029                   | 1,633   |
| Role of Hypercytokinemia/hyperchemokinememia in the Pathogenesis of Influenza | 5,79636691                      | 0       | 0,509261684                   | 0       |
| Th17 Activation Pathway                                                       | 5,752172021                     | 3,5     | 1,133602884                   | 3,162   |
| Role of RIG1-like Receptors in Antiviral Innate Immunity                      | 5,688755259                     | 2,333   | 2,150794101                   | 2,449   |
| iNOS Signaling                                                                | 5,584343342                     | 3,162   | 3,267745421                   | 2,121   |
| Aryl Hydrocarbon Receptor Signaling                                           | 5,399895352                     | 1,807   | 2,242282309                   | 1,069   |
| B Cell Receptor Signaling                                                     | 5,224189356                     | 3,545   | 1,463860724                   | 2,524   |
| IL-15 Production                                                              | 4,710149251                     | 3,638   | 0,402876847                   | 2,333   |
| Crosstalk between DC and NK                                                   | 5,195791833                     | 3,742   | 0,89461228                    | 1,89    |
| IL-15 Production                                                              | 4,710149251                     | 3,638   | 0,402876847                   | 2,333   |
| Production of NO and RO Species in Macrophages                                | 4,607415684                     | 3,71    | 1,658383408                   | 2,236   |
| BEX2 Signaling Pathway                                                        | 4,469391464                     | 0,277   | 1,482649183                   | 1,265   |
| Acute Phase Response Signaling                                                | 4,442869286                     | 3,153   | 3,96473143                    | 3,71    |
| Role of JAK1, JAK2 and TYK2 in Interferon Signaling                           | 4,282891999                     | 0       | 1,166798588                   | 0       |
| B Cell Activating Factor Signaling                                            | 4,270401843                     | 2,646   | 1,309580617                   | 2,236   |
| IL-9 Signaling                                                                | 4,183126507                     | 2,121   | 2,31853725                    | 1,89    |
| Communication between Innate and Adaptive Immune Cells                        | 4,165170081                     | 0       | 0,356106281                   | 0       |
| IL-23 Signaling Pathway                                                       | 4,015157259                     | 2,333   | 1,636391835                   | 1,89    |
| CD40 Signaling                                                                | 3,984220892                     | 0,632   | 2,033289628                   | 1,897   |
| PI3K Signaling in B Lymphocytes                                               | 3,973919273                     | 3,357   | 1,16765933                    | 2,496   |
| April Mediated Signaling                                                      | 3,637119196                     | 1,414   | 1,910321188                   | 1,89    |
| T Cell Exhaustion Signaling Pathway                                           | 3,633300389                     | 3,3     | 0,591510638                   | 1,897   |
| TNFR1 Signaling                                                               | 3,568386692                     | 1,414   | 2,32816913                    | 2,121   |
| ATM Signaling                                                                 | 3,535346727                     | -0,632  | 0,735966675                   | 1,134   |
| Agranulocyte Adhesion and Diapedesis                                          | 3,521694216                     | 0       | 1,815185695                   | 0       |
| RAR Activation                                                                | 3,492150953                     | 0       | 2,698918044                   | 0       |

| Pathways                         | Covid vs Mock ( <i>Calu-3</i> ) |         | Covid vs Mock ( <i>NHBE</i> ) |         |
|----------------------------------|---------------------------------|---------|-------------------------------|---------|
|                                  | -log(p-value)                   | z-score | -log(p-value)                 | z-score |
| IL-6 Signaling                   | 3,451654986                     | 3,873   | 2,121144973                   | 3,5     |
| 4-1BB Signaling in T Lymphocytes | 3,427157488                     | 2,236   | 1,790275559                   | 2,236   |
| Th1 and Th2 Activation Pathway   | 3,310325046                     | 0       | 1,022728542                   | 0       |
